# Supplementary material for: Muscular Dystrophy-Associated SUN1 and SUN2 Variants Disrupt Nuclear-Cytoskeletal Connections and Myonuclear Organization
Source: PubMed Central journal article supplement (PMC4161305; doi:10.1371/journal.pgen.1004605), 2014-09-11
Supplement: pgen.1004605.s003.pdf [file pgen.1004605.s003.pdf]

**Figure S3**

| SUN1                  | G68D              | G76A             | S79G             | R94H             | V197M            | A203V            | A325T             | G338S            | W377C            | A718V            | V846I            |
|-----------------------|-------------------|------------------|------------------|------------------|------------------|------------------|-------------------|------------------|------------------|------------------|------------------|
| Homo sapiens          | LGDG <b>E</b> AV  | ADSG <b>T</b> SS | GTSS <b>A</b> VS | TKQ <b>R</b> RST | RKD <b>V</b> LTA | AHP <b>A</b> APG | HLDA <b>A</b> HTA | RLP <b>G</b> RAG | SAL <b>W</b> LAV | EAG <b>A</b> SGI | DFAV <b>V</b> YL |
| Pongo abelii          | LGDG <b>E</b> AV  | ADSG <b>T</b> SS | GTSS <b>A</b> VS | AKQ <b>H</b> RSA | RKD <b>V</b> LTA | AHP <b>V</b> VPG | HLDA <b>A</b> HTA | RPP <b>G</b> RAG | SAL <b>W</b> LAV | EAG <b>A</b> SGI | DFAV <b>V</b> YL |
| Mus musculus          | SGDS <b>S</b> QAI | SHIS <b>T</b> SR | STSR <b>A</b> TP | VKQ <b>R</b> RSA | RTD <b>A</b> LTA | AHS <b>A</b> IHG | HLE <b>I</b> HTA  | QPH <b>R</b> VAG | SVL <b>W</b> LAV | QAG <b>T</b> SGI | DFAV <b>V</b> YL |
| Cavia porcellus       | SGDS <b>S</b> QAM | THSC <b>A</b> SS | CASS <b>T</b> AS | VKQ <b>R</b> RST | RTD <b>M</b> LTA | AAP <b>A</b> AHG | HLE <b>T</b> HTA  | KLH <b>R</b> VVG | SVL <b>W</b> LAI | EAG <b>T</b> SGI | DFAV <b>V</b> YL |
| Monodelphis domestica | SDDG <b>Q</b> VE  | THSY <b>T</b> RN | YTR <b>N</b> TAY | SKQ <b>H</b> RNT | RKD <b>V</b> LTA | AYS <b>T</b> SHV | HLE <b>T</b> YTT  | RSK <b>R</b> VAR | SFL <b>W</b> LAI | SLG <b>T</b> SGI | DFSV <b>V</b> YL |
| Taeniopygia guttata   | SDDG <b>Q</b> SD  | DSIH <b>D</b> SS | HDSS <b>Y</b> AG | VKQ <b>R</b> RS  | RKE <b>V</b> LTA | AYS <b>A</b> SPV | LLY <b>A</b> PRL  | RSD <b>G</b> MAC | SLL <b>W</b> LAI | NAG <b>T</b> SGI | NFAV <b>V</b> YL |
| Gallus gallus         | KPDS <b>A</b> RN  | DLL <b>H</b> DSS | HDSS <b>Y</b> AG | VKQ <b>R</b> KSI | RKE <b>V</b> LTA | AYS <b>A</b> SSV | QLE <b>I</b> HHT  | RAK <b>R</b> VAR | SLL <b>W</b> LAI | NAG <b>T</b> SGI | KFSV <b>V</b> YL |
| Xenopus tropicalis    | ADNS <b>S</b> ATS | ICAG <b>T</b> LS | GTL <b>S</b> KCS | MQO <b>H</b> NSS | RND <b>A</b> LTA | ALS <b>A</b> SYS | HHE <b>M</b> RTT  | WAR <b>G</b> VTG | SFL <b>W</b> LAI | TGA <b>T</b> DGI | DFAV <b>V</b> YL |
| Danio rerio           | YDNG <b>E</b> TE  | EVAG <b>N</b> HS | GNH <b>S</b> VGS | TTTT <b>S</b> SS | GNE <b>K</b> ETS | SYS <b>V</b> PYS | HME <b>M</b> NTE  | RML <b>T</b> VLW | SIL <b>W</b> FAV | TAE <b>A</b> AGM | RFSV <b>V</b> YL |

  

| SUN2                  | M50T              | A56P             | V146G            | V378I            | E438D            | V449L            | R620C             |
|-----------------------|-------------------|------------------|------------------|------------------|------------------|------------------|-------------------|
| Homo sapiens          | SSNM <b>K</b> RRL | LSP <b>A</b> PQL | YSD <b>V</b> DQQ | KKI <b>V</b> RAS | VAE <b>E</b> VGL | IQA <b>V</b> RDD | ARI <b>R</b> PPTA |
| Pongo abelii          | SSNM <b>K</b> RRL | LSP <b>A</b> PQL | YSD <b>A</b> DQQ | KKI <b>V</b> RAS | VAE <b>E</b> VGL | FQA <b>V</b> RDD | ARI <b>R</b> PPTA |
| Mus musculus          | SSNM <b>K</b> HLL | LSP <b>A</b> PQL | YAD <b>I</b> EQH | KKI <b>V</b> QAS | VAE <b>E</b> VGL | IQA <b>A</b> RAD | ARI <b>R</b> PPTA |
| Cavia porcellus       | SSNM <b>K</b> HLL | LSP <b>V</b> PQL | YAD <b>I</b> EQH | KKI <b>V</b> QAS | VEE <b>E</b> VGL | IQA <b>V</b> REE | ARI <b>R</b> PPTA |
| Monodelphis domestica | SGSM <b>K</b> RRL | LSP <b>A</b> PHL | NLGM <b>D</b> QP | KKI <b>I</b> QAF | LCPL <b>V</b> GS | IGH <b>A</b> THA | ALI <b>R</b> PPTA |
| Taeniopygia guttata   | SSST <b>K</b> RRL | LSP <b>T</b> PST | HYYS <b>G</b> QS | GKMA <b>Q</b> AS | MGKH <b>V</b> KG | LKT <b>V</b> RAD | GII <b>R</b> PPTA |
| Gallus gallus         | KSIN <b>K</b> QS  | LSR <b>A</b> SDT | GWL <b>V</b> SQK | RKLS <b>A</b> ES | VDA <b>Q</b> VKE | KMML <b>F</b> GD | MKI <b>Y</b> PPTA |
| Xenopus tropicalis    | RRKV <b>T</b> TLL | LKH <b>A</b> PTP | MAD <b>V</b> QQQ | QKM <b>H</b> NMF | LSQ <b>Q</b> VET | IQQ <b>V</b> RDG | SPI <b>H</b> PPTA |
| Danio rerio           | SRNS <b>S</b> SRA | ASS <b>V</b> SLI | HYE <b>Q</b> PIK | LMR <b>D</b> IEL | LHST <b>Q</b> DL | VDA <b>L</b> EAH | YPA <b>V</b> ITH  |
