# Supplementary material for: Muscular Dystrophy-Associated SUN1 and SUN2 Variants Disrupt Nuclear-Cytoskeletal Connections and Myonuclear Organization
Source: PubMed Central journal article supplement (PMC4161305; doi:10.1371/journal.pgen.1004605), 2014-09-11

Figure S4

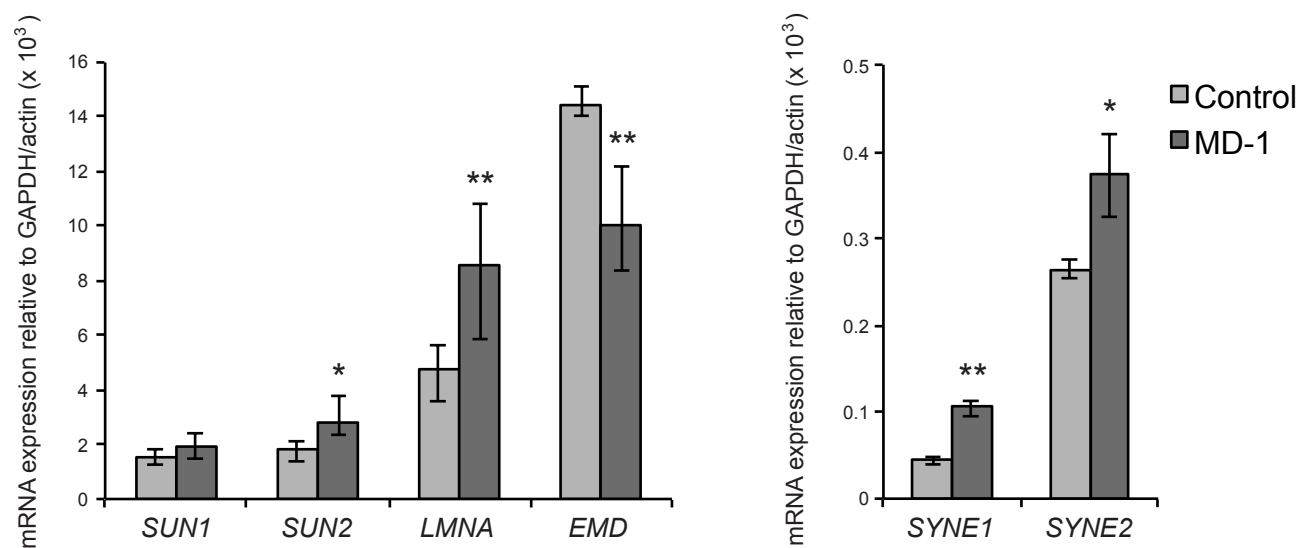

Supplement: pgen.1004605.s004.pdf [file pgen.1004605.s004.pdf]
