# Supplementary material for: Muscular Dystrophy-Associated SUN1 and SUN2 Variants Disrupt Nuclear-Cytoskeletal Connections and Myonuclear Organization
Source: PubMed Central journal article supplement (PMC4161305; doi:10.1371/journal.pgen.1004605), 2014-09-11
Supplement: pgen.1004605.s008.pdf [file pgen.1004605.s008.pdf]

**Table S1**

| Gene        | DNA variation        | Amino acid exchange | Frequency in all patients (n=490 alleles) | Frequency in reference population (n=400 alleles) | rs-number   | NHLBI-ESP:ESP_Cohort_Populations <sup>1</sup> | 1000GENOMES: phase_1_ALL <sup>2</sup> |
|-------------|----------------------|---------------------|-------------------------------------------|---------------------------------------------------|-------------|-----------------------------------------------|---------------------------------------|
| <i>SUN1</i> | c.114 G>A            | p. T38T             | 3                                         | N/D                                               | rs76073621  | ---                                           | 87/2097                               |
| <i>SUN1</i> | <b>c.203 G&gt;A</b>  | <b>p. G68D</b>      | 1                                         | ---                                               | rs188935423 | ---                                           | 4/2180                                |
| <i>SUN1</i> | <b>c.227 G&gt;C</b>  | <b>p. G76A</b>      | 1                                         | N/D                                               | rs149038179 | ---                                           | 5/2179                                |
| <i>SUN1</i> | <b>c.235 A&gt;G</b>  | <b>p. S79G</b>      | 1                                         | ---                                               |             | ---                                           | ---                                   |
| <i>SUN1</i> | <b>c.281 G&gt;A</b>  | <b>p. R94H</b>      | 1                                         | N/D                                               | rs112598200 | ---                                           | 1/2183                                |
| <i>SUN1</i> | c.352 C>T            | p. H118Y            | 203                                       | N/D                                               | rs6461378   | ---                                           | 1153/1031                             |
| <i>SUN1</i> | c.366 C>T            | p. V122V            | 6                                         | N/D                                               | rs41273066  | ---                                           | 13/2171                               |
| <i>SUN1</i> | c.543 C>T            | p. N181N            | 1                                         | N/D                                               |             | ---                                           | ---                                   |
| <i>SUN1</i> | <b>c.589 G&gt;A</b>  | <b>p. V197M</b>     | 1                                         | ---                                               | rs116520953 | ---                                           | 7/2177                                |
| <i>SUN1</i> | c.606 C>T            | p. P202P            | 21                                        | N/D                                               | rs113652875 | ---                                           | 54/2130                               |
| <i>SUN1</i> | <b>c.608 C&gt;T</b>  | <b>p. A203V</b>     | 1                                         | N/D                                               | rs144929525 | ---                                           | 4/2180                                |
| <i>SUN1</i> | c.869 A>G            | p. Y290C            | 28                                        | N/D                                               | rs74742245  | ---                                           | 358/1826                              |
| <i>SUN1</i> | <b>c.973 G&gt;A</b>  | <b>p. A325T</b>     | 2                                         | N/D                                               | rs139112134 | ---                                           | 7/2177                                |
| <i>SUN1</i> | <b>c.1013 G&gt;A</b> | <b>p. G338S</b>     | 1                                         | 1*                                                |             | ---                                           | ---                                   |
| <i>SUN1</i> | <b>c.1131 G&gt;T</b> | <b>p. W377C</b>     | 2                                         | ---                                               | rs142011077 | ---                                           | 5/2179                                |
| <i>SUN1</i> | c.1815 A>G           | p. T605T            | 160                                       | N/D                                               | rs10950789  | ---                                           | 968/1216                              |
| <i>SUN1</i> | c.1819 G>A           | p. E607K            | 76                                        | N/D                                               | rs59910530  | ---                                           | 359/1825                              |
| <i>SUN1</i> | <b>c.2153 C&gt;T</b> | <b>p. A718V</b>     | 1                                         | ---                                               | rs114701323 | ---                                           | 1/2183                                |
| <i>SUN1</i> | c.2436 G>A           | p. R812R            | 6                                         | N/D                                               | rs61744747  | ---                                           | 94/2090                               |
| <i>SUN1</i> | <b>c.2536 G&gt;A</b> | <b>p. V846I</b>     | 1                                         | 1                                                 |             | ---                                           | ---                                   |
| <i>SUN1</i> | c.2592 G>A           | p. T864T            | 1                                         | N/D                                               |             | ---                                           | ---                                   |
| <i>SUN2</i> | c.97 A>G             | p. T33A             | 2                                         | N/D                                               | rs2072799   | 5/4545                                        | 103/2081                              |
| <i>SUN2</i> | <b>c.149 T&gt;C</b>  | <b>p. M50T</b>      | 1                                         | ---                                               |             | ---                                           | ---                                   |
| <i>SUN2</i> | <b>c.166 G&gt;C</b>  | <b>p. A56P</b>      | 1                                         | N/D                                               | rs137966643 | 2/4550                                        | ---                                   |
| <i>SUN2</i> | c.266 T>G            | p. L89R             | 52                                        | N/D                                               | rs35496634  | 351/4197                                      | 128/2056                              |
| <i>SUN2</i> | <b>c.437 T&gt;G</b>  | <b>p. V146G</b>     | 1                                         | ---                                               |             | ---                                           | ---                                   |
| <i>SUN2</i> | c.657 G>A            | p. P219P            | 1                                         | N/D                                               | rs143617240 | 5/4547                                        | ---                                   |
| <i>SUN2</i> | c.1042 C>T           | p. R348C            | 12                                        | N/D                                               | rs138708    | 59/4491                                       | 84/2100                               |
| <i>SUN2</i> | <b>c.1132 G&gt;A</b> | <b>p. V378I</b>     | 4                                         | 3                                                 | rs139004902 | 26/4522                                       | 12/2172                               |
| <i>SUN2</i> | <b>c.1314 A&gt;T</b> | <b>p. E438D</b>     | 1                                         | 2                                                 |             | ---                                           | ---                                   |
| <i>SUN2</i> | <b>c.1345 G&gt;C</b> | <b>p. V449L</b>     | 1                                         | ---                                               |             | ---                                           | ---                                   |
| <i>SUN2</i> | c.1824 A>G           | p. Q608Q            | 151                                       | N/D                                               | rs1062687   | 1708/2734                                     | 860/1324                              |
| <i>SUN2</i> | <b>c.1858 C&gt;T</b> | <b>p. R620C</b>     | 1                                         | ---                                               | rs141013997 | 3/4433                                        | ---                                   |
| <i>SUN2</i> | c.2011 G>A           | p. G671S            | 49                                        | N/D                                               | rs2072797   | 363/4185                                      | 248/1936                              |

---, not detected

<sup>1</sup> Data from ENSEMBL: 1000GENOMES:phase\_1\_ALL:

[http://www.ncbi.nlm.nih.gov/SNP/snp\\_viewTable.cgi?pop=14318](http://www.ncbi.nlm.nih.gov/SNP/snp_viewTable.cgi?pop=14318)

<sup>2</sup> Data from ENSEMBL: NHLBI-ESP:ESP\_CohortPopulations <http://www.1000genomes.org/faq/which-populations-are-part-your-study>
