# Supplementary material for: Muscular Dystrophy-Associated SUN1 and SUN2 Variants Disrupt Nuclear-Cytoskeletal Connections and Myonuclear Organization
Source: PubMed Central journal article supplement (PMC4161305; doi:10.1371/journal.pgen.1004605), 2014-09-11
Supplement: pgen.1004605.s009.pdf [file pgen.1004605.s009.pdf]

**Table S2**

| Gene/Exon          | Orientation | Primer sequence (5'-3')      | Amplicon size (bp) | Annealing temperature (°C) |
|--------------------|-------------|------------------------------|--------------------|----------------------------|
| <i>SUN1</i> E1     | F           | TTTCCTGCCCGTTAAAACAC         | 227                | 62                         |
|                    | R           | TGGAGTTCCTGTTAAGGTCCA        |                    |                            |
| <i>SUN1</i> E2     | F           | CATTTTGTTCAGAAATGGGG         | 312                | 61                         |
|                    | R           | TGGAAGCTTGTTTAACTGG          |                    |                            |
| <i>SUN1</i> E3     | F           | TGCTGTTTATTCCCAGATTAAGAG     | 323                | 62                         |
|                    | R           | ACTGTAGGCGGGACAATCTG         |                    |                            |
| <i>SUN1</i> E4/5   | F           | GACCAGTGCCATAATGCTG          | 536                | 64                         |
|                    | R           | TCCAAGACAAATAGTGCAGACAC      |                    |                            |
| <i>SUN1</i> E6     | F           | GGGCTCTCCCAAGTGATT           | 452                | 64                         |
|                    | R           | CAGCACCAAGACCACAGGAG         |                    |                            |
| <i>SUN1</i> E7     | F           | CTAGCCTTGCACATCCTCT          | 320                | 64                         |
|                    | R           | CAACAGCCCGTCGTCATCAG         |                    |                            |
| <i>SUN1</i> E8     | F           | GAATCCGCCACACTACTG           | 190                | 64                         |
|                    | R           | GTGACAGGGCGAGATGAGAC         |                    |                            |
| <i>SUN1</i> E9     | F           | GTCAGTGCAGAGGCTGGTC          | 218                | 64                         |
|                    | R           | AGGTGCTTAGCTGCCAGAAG         |                    |                            |
| <i>SUN1</i> E10    | F           | CATTTAGGAGCTTGGTTTTCC        | 194                | 62                         |
|                    | R           | CTTAAAGCACACGCTGAC           |                    |                            |
| <i>SUN1</i> E11/12 | F           | GATTGGTGAACCCTGACTTTC        | 440                | 62                         |
|                    | R           | GTGCAGTGCCAGCTGAGAG          |                    |                            |
| <i>SUN1</i> E13    | F           | TGCTTGTGTGACTACCTGGTTTC      | 304                | 64                         |
|                    | R           | CAGAAGCGCGTTGGGTGC           |                    |                            |
| <i>SUN1</i> E14    | F           | GTAGAAACGCCTTGGCCTG          | 245                | 62                         |
|                    | R           | GACCAAAGGGCTTTAAAATATTAG     |                    |                            |
| <i>SUN1</i> E15    | F           | GGGTATTCCAGATAAATCAATGG      | 206                | 62                         |
|                    | R           | CGCTCCACATAACCACACAC         |                    |                            |
| <i>SUN1</i> E16    | F           | CCCCTCAGCCTGTGTGTAGTG        | 283                | 61                         |
|                    | R           | AAACCTAAGTCATCAATTCAAGTTTTTC |                    |                            |
| <i>SUN1</i> E17    | F           | TGGTCCTGCATTATTGGAGGGGTT     | 551                | 58                         |
|                    | R           | CACACCCAGCCAGACCACT          |                    |                            |
| <i>SUN1</i> E18    | F           | TGGTGTTTGGTCTTCCGTC          | 183                | 64                         |
|                    | R           | AAGTGCACACCCCTGCTAAC         |                    |                            |
| <i>SUN1</i> E19    | F           | TGGTGGAAGTGGACACTGAG         | 214                | 64                         |
|                    | R           | CACTAACCGAGTCCATGCTG         |                    |                            |
| <i>SUN1</i> E20    | F           | TCCTCTTCTGCTGCTAAGTG         | 320                | 64                         |
|                    | R           | CAGTGCCTCACGTCCT             |                    |                            |
| <i>SUN1</i> E21    | F           | TAGTGCTGGCTGTGGAAGG          | 240                | 64                         |
|                    | R           | CCTGCTGTCACGAGAAGTTG         |                    |                            |
| <i>SUN1</i> E22    | F           | CAGACGTCATATTGGGGGAAG        | 594                | 62                         |
|                    | R           | TATCTGCCCTCCAAAAGTCC         |                    |                            |
| <i>SUN2</i> E1     | F           | CTAGAGAGGAGCTGGGGACA         | 203                | 63                         |
|                    | R           | AGGTTGCAACAAGAAGGCAG         |                    |                            |
| <i>SUN2</i> E2     | F           | GCCAGCATTGGGAGAGTCAG         | 410                | 52                         |
|                    | R           | GCAGAGAGGTGCTCTGAGGA         |                    |                            |
| <i>SUN2</i> E3     | F           | CTCACAGTGTCCCCTGCAGT         | 363                | 59                         |
|                    | R           | CACATGCTGCCCTCTCTCCA         |                    |                            |
| <i>SUN2</i> E4     | F           | CATTCCTFACTGCACACCGG         | 344                | 55                         |
|                    | R           | GGTCTACAGTCTCTCTGCA          |                    |                            |
| <i>SUN2</i> E5     | F           | CAGGACAGAGGCATACTGGC         | 361                | 50                         |
|                    | R           | GGGAAGCTACTCCGTGATCG         |                    |                            |
| <i>SUN2</i> E6     | F           | GCTCTAGTTCAGCACCCAGG         | 262                | 59                         |
|                    | R           | CTGCCTGCCAAAGGTCACCA         |                    |                            |

|                 |   |                       |     |    |
|-----------------|---|-----------------------|-----|----|
| <i>SUN2</i> E7  | F | CTGGCAGGGATCAGGTAGCC  | 240 | 50 |
|                 | R | GGGAGCTACCACCCTCAGAG  |     |    |
| <i>SUN2</i> E8  | F | GCATGGCCTTATGCTGGAAC  | 494 | 55 |
|                 | R | GCAGAGCTGTCTGATCCCAA  |     |    |
| <i>SUN2</i> E9  | F | GCCACTTCCTAGTCATGAGG  | 213 | 50 |
|                 | R | GGTGAACATGTTGGATGGGG  |     |    |
| <i>SUN2</i> E10 | F | GACGCTAACAGACAGCAGAT  | 251 | 49 |
|                 | R | CCTACCATCTGCTTGGCAAG  |     |    |
| <i>SUN2</i> E11 | F | G TTCACAATGAGTGCTGGGC | 406 | 54 |
|                 | R | CTTGGGCATAACAGAGGCTG  |     |    |
| <i>SUN2</i> E12 | F | CCTGCTATCCAGCTAAGCAC  | 419 | 52 |
|                 | R | CACTTCCATCCTGGAACCTG  |     |    |
| <i>SUN2</i> E13 | F | CACAGTGCAAGCCTAGAAGG  | 276 | 55 |
|                 | R | CACCAACCTGGTAGATGCCA  |     |    |
| <i>SUN2</i> E14 | F | CTCGGTTAGGGTTAAAGGCT  | 349 | 55 |
|                 | R | GAAAGTCATGTCAGGACAGG  |     |    |
| <i>SUN2</i> E15 | F | CATCTGGGGTCAGCAAGAGC  | 346 | 61 |
|                 | R | CCAAATCCACTCCCCTCCCT  |     |    |
| <i>SUN2</i> E16 | F | GAAGTGA CTTGTCATAGGCC | 351 | 55 |
|                 | R | CATCTTGAGCTGTGGGAAAG  |     |    |
| <i>SUN2</i> E17 | F | GGAGCTTTTGAAGCCTGGTT  | 407 | 52 |
|                 | R | CCCGTCCTTTTCATCTGCAT  |     |    |
