# Supplementary material for: Muscular Dystrophy-Associated SUN1 and SUN2 Variants Disrupt Nuclear-Cytoskeletal Connections and Myonuclear Organization
Source: PubMed Central journal article supplement (PMC4161305; doi:10.1371/journal.pgen.1004605), 2014-09-11
Supplement: pgen.1004605.s010.pdf [file pgen.1004605.s010.pdf]

**Table S3**

| <b>Gene</b>  | <b>Primers</b>                 |
|--------------|--------------------------------|
| <i>SUN1</i>  | 5'-TCAGCTTCGGTCAGAGACG-3'      |
|              | 5'-TGGTGAAAGGCCATAAAGTCA-3'    |
| <i>SUN2</i>  | 5'-AAACTGCTGCTCGCATCC-3'       |
|              | 5'-GAGTCTTGCTGATGCTCTGCT-3'    |
| <i>LMNA</i>  | 5'-GCTCAGTGACTGTGGTTGAGG-3'    |
|              | 5'-AGCGCAGGTTGTACTIONCAGC-3'   |
| <i>EMD</i>   | 5'-GACTTCATTCCCAGATGCTGA-3'    |
|              | 5'-TACATGGGGCGTTCCTA-3'        |
| <i>SYNE1</i> | 5'-GCAAATCAGCCAAATTAAGGTC-3'   |
|              | 5'-TGAGCAAAAGACTGGGCTTC-3'     |
| <i>SYNE2</i> | 5'-CAAATCTGTTTTGGATCAAGATGA-3' |
|              | 5'-GCCTTTGGCAATAAGATGCT-3'     |
| <i>ACTB</i>  | 5'-GGCCAGGTCATCACCATT-3'       |
|              | 5'-GGATGCCACAGGACTCCAT-3'      |
| <i>GAPDH</i> | 5'-CTCTGCTCCTCCTGTTTCGAC-3'    |
|              | 5'-ACGACCAAATCCGTTGACTC-3'     |
